# Supplementary material for: CeO2 nanofibers for in situ O2 and CO sensing in harsh environments
Source: Royal Society of Chemistry journal article supplement (doi:10.1039/c2ra20126g), 2012-01-01
Supplement: c2ra20126g.pdf [file c2ra20126g.pdf]

## Supplementary materials

### CeO<sub>2</sub> nanofibers for *in-situ* O<sub>2</sub> and CO sensing in harsh environment

Yixin Liu,<sup>a</sup> Yu Ding,<sup>a</sup> Lichun Zhang,<sup>b</sup> Pu-Xian Gao,<sup>a,b</sup> and Yu Lei<sup>\*a</sup>

<sup>a</sup> Department of Chemical, Materials and Biomolecular Engineering, University of Connecticut,  
191 Auditorium Road, Unit 3222, Storrs, CT 06269, USA.

<sup>b</sup> Institute of Material Sciences, University of Connecticut, 97 North Eagleville Road, Unit 3136,  
Storrs, CT 06269, USA.

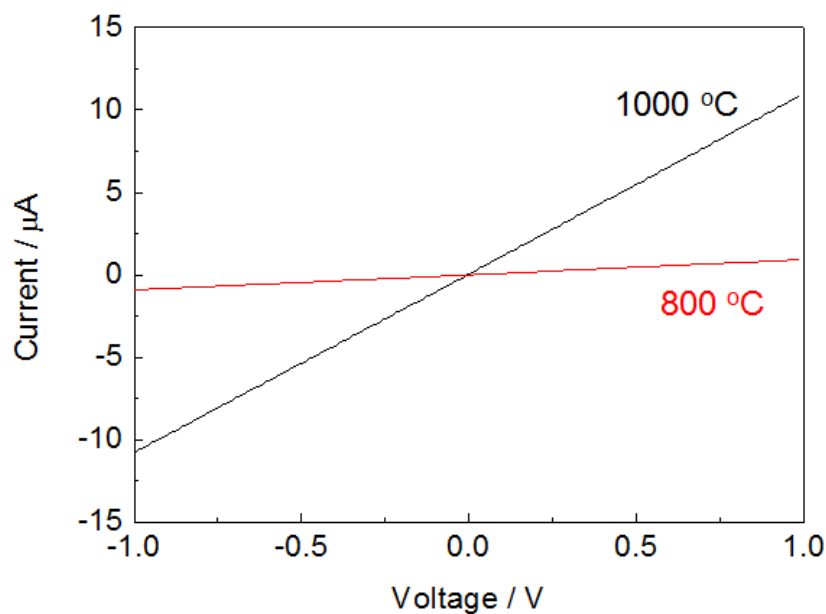

**Figure S1.** *I-V* profiles of CeO<sub>2</sub> nanofibers-based sensor at 800 and 1000 °C.

**Table S1. Sensing performance of various resistor-type CO sensors**

|                                                      | Operating<br>T/ °C | Carrying<br>gas                   | C <sub>CO</sub> *<br>/ppm | Sensitivity<br>(R <sub>0</sub> /R <sub>g</sub> ) | Response<br>time t <sub>90</sub> /s | Ref. |
|------------------------------------------------------|--------------------|-----------------------------------|---------------------------|--------------------------------------------------|-------------------------------------|------|
| Anatase/La <sub>2</sub> O <sub>3</sub> /CuO          | 600                | N <sub>2</sub> +5%O <sub>2</sub>  | 200                       | 1.8                                              | -                                   | [1]  |
| Anatase/La <sub>2</sub> O <sub>3</sub> /CuO          | 600                | N <sub>2</sub>                    | 250                       | 4                                                | -                                   | [2]  |
| SnO <sub>2</sub>                                     | 250                | N <sub>2</sub> +10%O <sub>2</sub> | 6000                      | ~1.3                                             | 30                                  | [3]  |
| Pt/SnO <sub>2</sub>                                  | 150                | air                               | 600                       | 55                                               | -                                   | [4]  |
| Pt/SnO <sub>2</sub>                                  | 400                | air                               | 10                        | 2.3                                              | 6                                   | [5]  |
| CuO/ZnO/SnO <sub>2</sub>                             | 200                | air                               | 200                       | 8                                                | -                                   | [6]  |
| Au/SnO <sub>x</sub>                                  | 200                | wet air                           | 100                       | 6.5                                              | 133                                 | [7]  |
| CuO/Zn <sub>2</sub> SnO <sub>4</sub>                 | 300                | air                               | 200                       | 14                                               | -                                   | [8]  |
| SnO <sub>2</sub> / Zn <sub>2</sub> SnO <sub>4</sub>  | 350                | air                               | 200                       | 12                                               | -                                   | [9]  |
| BaSnO <sub>3</sub>                                   | 650                | N <sub>2</sub>                    | 5000                      | 3                                                | -                                   | [10] |
| CeO <sub>2</sub>                                     | 450                | air                               | 5000                      | 3.1                                              | 2                                   | [11] |
| Au/SnO <sub>2</sub> /Ga <sub>2</sub> O <sub>3</sub>  | 600                | wet air                           | 100                       | 2.2                                              | ~ 60                                | [12] |
| La <sub>0.9</sub> Ce <sub>0.1</sub> CoO <sub>3</sub> | 100                | air                               | 100                       | 3.4 (R <sub>g</sub> /R <sub>0</sub> )            | -                                   | [13] |
| LaCoO <sub>3</sub> -PdO                              | 200                | air                               | 100                       | 16(R <sub>g</sub> /R <sub>0</sub> )              | -                                   | [14] |
| ZnO                                                  | 350                | air                               | 250                       | 8                                                | -                                   | [15] |
| Al/ZnO                                               | 400                | air                               | 1000                      | 2.5                                              | -                                   | [16] |
| ZnO-ITO                                              | 350                | air                               | 100                       | 60                                               | -                                   | [17] |
| ZnO-ITO                                              | 500                | air                               | 100                       | 8                                                | -                                   | [17] |
| Present work                                         | 800                | N <sub>2</sub>                    | 100                       | 48.3                                             | 130                                 |      |
|                                                      | 1000               | N <sub>2</sub>                    | 100                       | 29.7                                             | 142                                 |      |

\* The concentration of CO which was used to calculate the sensitivity in each paper.

The sensitivity of the previous reported sensors were recalculated based on the data presented in the papers. The best result of each paper was chosen.

## Reference

1. N. O. Savage, S. A. Akbar and P. K. Dutta, *Sens. Actuator B-Chem.*, 2001, **72**, 239-248.
2. P. K. Dutta, A. Ginwalla, B. Hogg, B. R. Patton, B. Chwieroth, Z. Liang, P. Gouma, M. Mills and S. Akbar, *J. Phys. Chem. B*, 1999, **103**, 4412-4422.
3. A. Kolmakov, Y. X. Zhang, G. S. Cheng and M. Moskovits, *Adv. Mater.*, 2003, **15**, 997-1000.
4. I. Kocemba and J. Rynkowski, *Sens. Actuator B-Chem.*, 2011, **155**, 659-666.
5. C. S. Moon, H. R. Kim, G. Auchterlonie, J. Drennan and J. H. Lee, *Sens. Actuator B-Chem.*, 2008, **131**, 556-564.
6. J. H. Yu and G. M. Choi, *Sens. Actuator B-Chem.*, 2001, **75**, 56-61.
7. F. R. Juang, Y. K. Fang and H. Y. Chiu, *Microelectron. Reliab.*, 2012, **52**, 425-429.
8. J. H. Yu and G. M. Choi, *J. Electroceram.*, 2002, **8**, 249-255.
9. W. J. Moon, J. H. Yu and G. M. Choi, *Sens. Actuator B-Chem.*, 2001, **80**, 21-27.
10. U. Lampe, J. Gerblinger and H. Meixner, *Sens. Actuator B-Chem.*, 1995, **25**, 657-660.
11. N. Izu, S. Nishizaki, T. Itoh, M. Nishibori, W. Shin and I. Matsubara, *Sens. Actuator B-Chem.*, 2009, **136**, 364-370.
12. T. Schwebel, M. Fleischer, H. Meixner and C. D. Kohl, *Sens. Actuator B-Chem.*, 1998, **49**, 46-51.

13. M. Ghasdi, H. Alamdari, S. Royer and A. Adnot, *Sens. Actuator B-Chem.*, 2011, **156**, 147-155.
14. A. V. Salker, N. J. Choi, J. H. Kwak, B. S. Joo and D. D. Lee, *Sens. Actuator B-Chem.*, 2005, **106**, 461-467.
15. H. W. Ryu, B. S. Park, S. A. Akbar, W. S. Lee, K. J. Hong, Y. J. Seo, D. C. Shin, J. S. Park and G. P. Choi, *Sens. Actuator B-Chem.*, 2003, **96**, 717-722.
16. J. F. Chang, H. H. Kuo, I. C. Leu and M. H. Hon, *Sens. Actuator B-Chem.*, 2002, **84**, 258-264.
17. A. Donato, F. Della Corte, M. Gioffre, N. Donato, A. Bonavita, G. Micali and G. Neri, *Thin Solid Films*, 2009, **517**, 6184-6187.
